# Supplementary material for: One-step MOF-derived Co/Co9S8 nanoparticles embedded in nitrogen, sulfur and oxygen ternary-doped porous carbon: an efficient electrocatalyst for overall water splitting
Source: Royal Society of Chemistry journal article supplement (doi:10.1039/c9cc00196d), 2019-01-01
Supplement: c9cc00196d1.pdf [file c9cc00196d1.pdf]

**Electronic Supplementary Material (ESI) for Chemical Communications.**

**This journal is © The Royal Society of Chemistry 2019**

**Electronic Supplementary Information**

**One-step MOF-derived Co/Co<sub>9</sub>S<sub>8</sub> nanoparticles embedded in nitrogen, sulfur  
and oxygen ternary-doped porous carbon: efficient electrocatalyst for overall  
water splitting**

Jiao Du, Rui Wang,\* Ya-Ru Lv, Yong-Li Wei, Shuang-Quan Zang\*

College of Chemistry and Molecular Engineering Zhengzhou University Zhengzhou  
450001, China

## Experimental section

**Materials:** All chemicals used in the experiment were purchased commercially and without further purification, which included cobalt nitrate hexahydrate ( $\text{Co}(\text{NO}_3)_2 \cdot 6\text{H}_2\text{O}$ , 99%), 1,3-bis(4-pyridyl)propane (bpp, 97%), 2,5-thiophenedicarboxylic acid ( $\text{H}_2\text{tda}$ , 98%), commercial  $\text{RuO}_2$  (99.9%) and Pt/C (Pt 20 wt.%), N,N-Dimethylformamide (DMF), deionized water. All the solvents used were in analytical grade.

**Synthesis of Co-NSOMOF:** Co-NSOMOF was prepared with the improved method according to the literature.<sup>19</sup>  $\text{Co}(\text{NO}_3)_2 \cdot 6\text{H}_2\text{O}$  (0.435 g), 2,5-thiophenedicarboxylic acid (0.1721 g), 1,3-bis(4-pyridyl)propane (0.1982 g) were dissolved in 30 mL N,N-dimethylformamide (DMF) under room temperature with stirring for 2 h. Then the mixture was refluxed for 12 h at 120 °C to form the purple precipitates. The resulting product was collected by centrifugation and washed with water and ethanol several times, followed by drying at 60 °C overnight.

**Synthesis of Co/Co<sub>9</sub>S<sub>8</sub>@NSOC catalysts:** The Co/Co<sub>9</sub>S<sub>8</sub>@NSOC catalysts were synthesized by the pyrolysis of Co-NSOMOF precursor. The Co-NSOMOF was placed in a tube furnace and calcined at various temperatures (600, 700, 800 and 900 °C) for 3 h under a flowing N<sub>2</sub> with a heating rate of 10 °C min<sup>-1</sup>. After naturally falling to room temperature, the resulting products were treated in aqueous HCl solution for 6 h, followed by centrifugation and washed with deionized water and ethanol several times. Then the obtained products were dried at 60 °C for 12 h. The catalysts synthesized at different temperatures were named as Co/Co<sub>9</sub>S<sub>8</sub>@NSOC-T (T represents different pyrolysis temperatures).

**Material characterization:** The X-ray diffraction (XRD) patterns of the compounds were recorded on a Rigaku B/Max-RB X-ray diffractometer with Cu K<sub>α</sub> radiation ( $\lambda=1.5418 \text{ \AA}$ ). The X-ray photoelectron spectroscopy (XPS) measurements were carried out by ESCALAB 250 system (Thermo Electron) with an Al K<sub>α</sub> (300 W) X-ray resource. The scanning electron microscope (SEM) measurements were performed using Zeiss Sigma 500. The transmission electron microscopy (TEM) images were obtained in FEI Tecnai G2 F20 S-TWIN electron microscope at an accelerating voltage of 200 kV. The Raman spectra were recorded on a LabRam HR Evolution. Nitrogen adsorption isotherms were measured at 77 K by using automatic volumetric adsorption equipment (Belsorp Max).

**Electrochemical measurements:** The electrochemical measurements were carried out with a typical three-electrode system by using CHI 660E electrochemical analyzer (CH Instruments Inc.). The Ag/AgCl (KCl, saturated) electrode and glassy carbon electrode coated with the as-prepared catalysts ink was used as the reference electrode and working electrode respectively. A graphite rod was used as the counter electrode (as considering that metal Pt will dissolve to some extent during the electrochemical cycling in electrolyte).<sup>3, S1</sup> The well-dispersed catalyst ink was prepared by dispersing 2 mg of the catalyst in 220  $\mu\text{L}$  solution that containing 100  $\mu\text{L}$  water, 100  $\mu\text{L}$  DMF and 20  $\mu\text{L}$  5 wt.% Nafion solution, followed by ultrasonication for 30 minutes. Then, 5  $\mu\text{L}$  of the catalyst ink was pipetted onto the glass-carbon electrode (GCE) with a catalyst loading of 0.64 mg  $\text{cm}^{-2}$ . The linear sweep voltammetry (LSV) curves were obtained at a scan rate of 5 mV  $\text{s}^{-1}$  in 1 M KOH solution. The chronoamperometric measurement of Co/Co<sub>9</sub>S<sub>8</sub>@NSOC-800 was conducted at a constant working potential for 10 h in 1 M KOH. The electrochemical impedance spectroscopy (EIS) measurements were carried out from 1000000 Hz to 0.1 Hz with an AC voltage amplitude of 5 mV. In all measurements, all the potentials were converted to the reversible hydrogen electrode (RHE) through RHE calibration:  $E_{\text{RHE}} = E_{\text{Ag/AgCl}} + 0.197 + 0.059 \times \text{pH}$ . The overpotential ( $\eta$ ) was calculated according to the following formula:

$$\text{OER: } \eta = E_{\text{RHE}} - 1.23 \text{ V}$$

$$\text{HER: } \eta = E_{\text{RHE}} - 0 \text{ V}$$

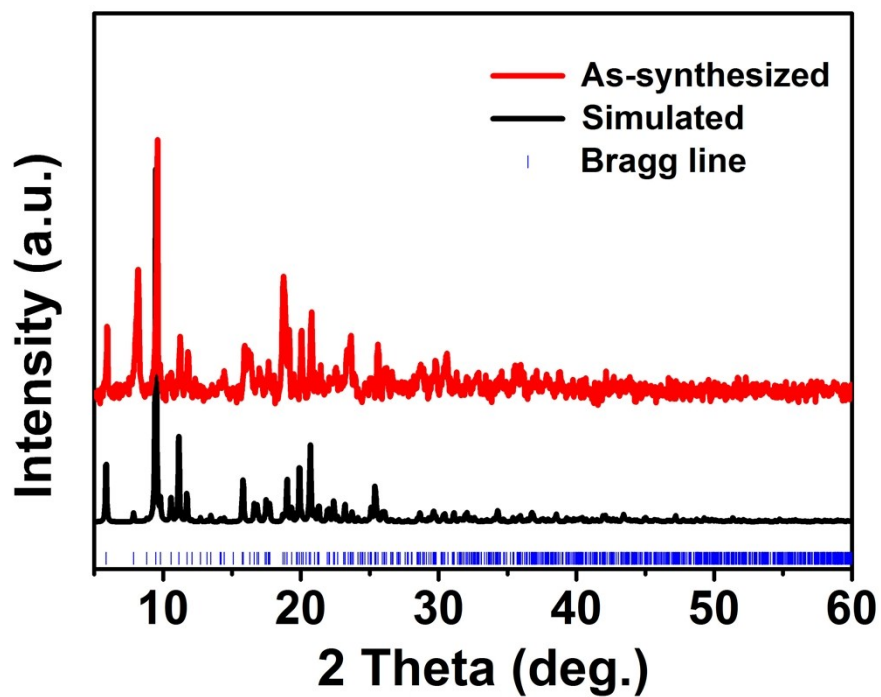

**Fig. S1** PXRD pattern of as-prepared Co-NSOMOF. (Simulated pattern was obtained from the single-crystal data by the Mercury 1.8, CCDC number: 805455).

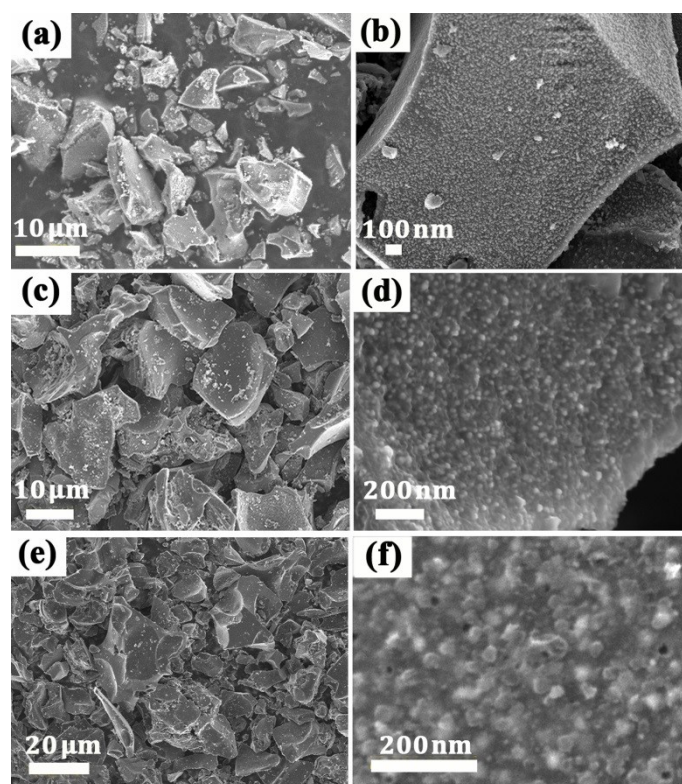

**Fig. S2** SEM images of the (a, b) Co/Co<sub>9</sub>S<sub>8</sub>@NSOC-600; (c, d) Co/Co<sub>9</sub>S<sub>8</sub>@NSOC-700; (e, f) Co/Co<sub>9</sub>S<sub>8</sub>@NSOC-900.

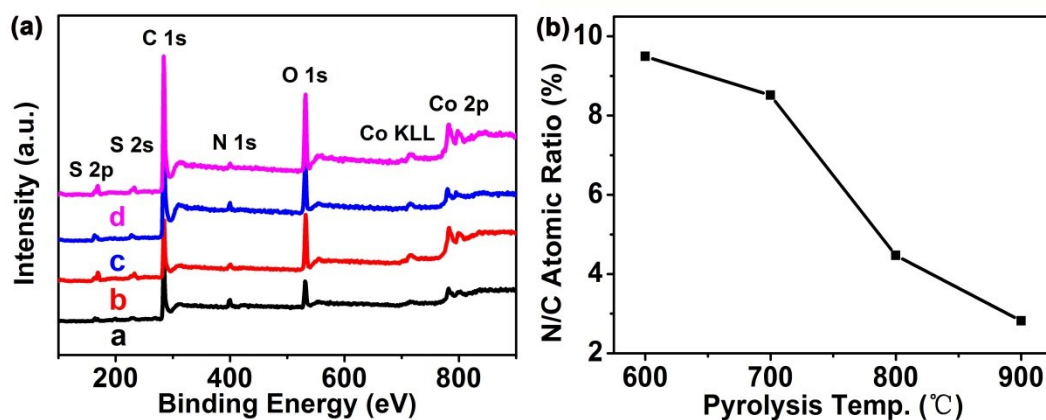

**Fig. S3** XPS spectra and results based on the spectra for Co/Co<sub>9</sub>S<sub>8</sub>@NSOC materials.

(a) XPS survey spectra. Lines a, b, c and d are Co/Co<sub>9</sub>S<sub>8</sub>@NSOC-600, Co/Co<sub>9</sub>S<sub>8</sub>@NSOC-700, Co/Co<sub>9</sub>S<sub>8</sub>@NSOC-800, and Co/Co<sub>9</sub>S<sub>8</sub>@NSOC-900; (b) N/C atomic ratios of Co/Co<sub>9</sub>S<sub>8</sub>@NSOC-T materials.

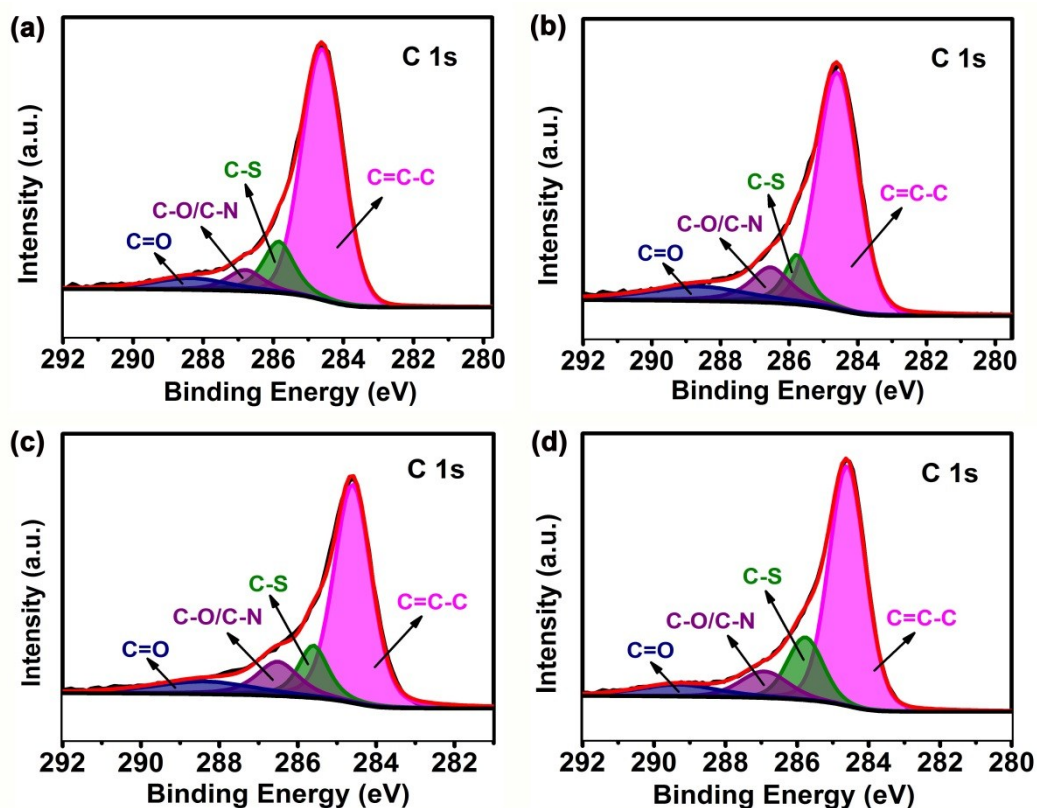

**Fig. S4** High-resolution XPS spectra of C 1s for (a) Co/Co<sub>9</sub>S<sub>8</sub>@NSOC-600; (b) Co/Co<sub>9</sub>S<sub>8</sub>@NSOC-700; (c) Co/Co<sub>9</sub>S<sub>8</sub>@NSOC-800; (d) Co/Co<sub>9</sub>S<sub>8</sub>@NSOC-900.

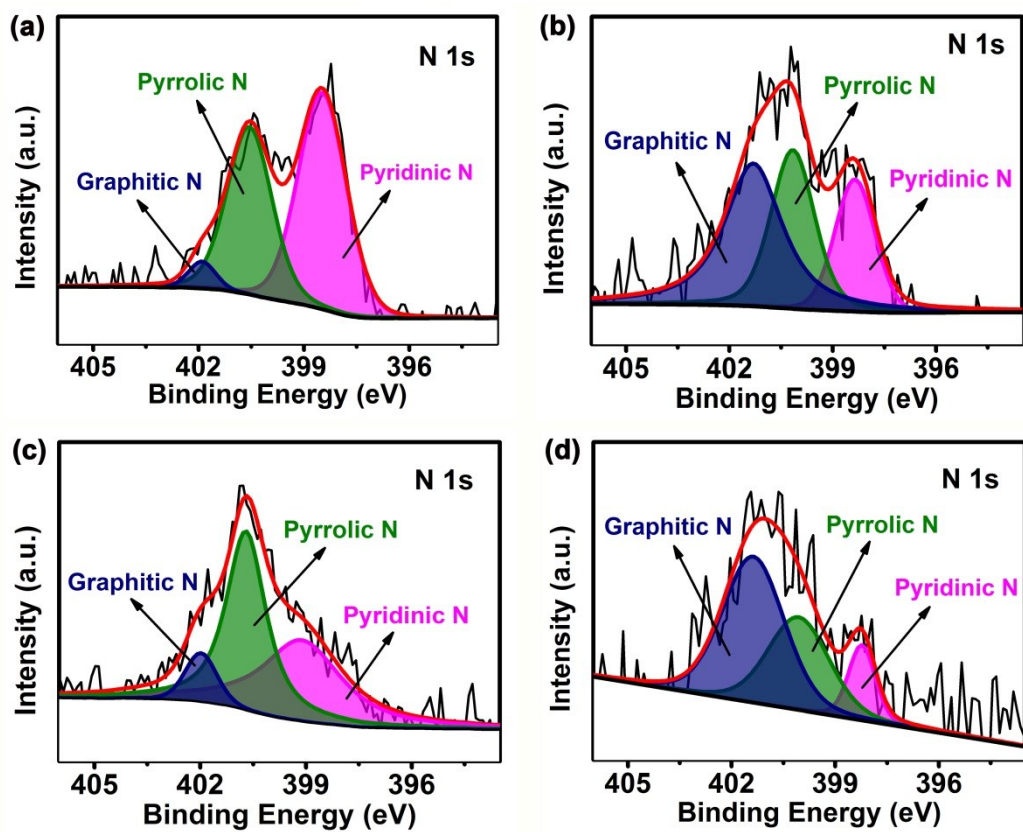

**Fig. S5** High-resolution XPS spectra of N 1s for (a) Co/Co<sub>9</sub>S<sub>8</sub>@NSOC-600; (b) Co/Co<sub>9</sub>S<sub>8</sub>@NSOC-700; (c) Co/Co<sub>9</sub>S<sub>8</sub>@NSOC-800; (d) Co/Co<sub>9</sub>S<sub>8</sub>@NSOC-900.

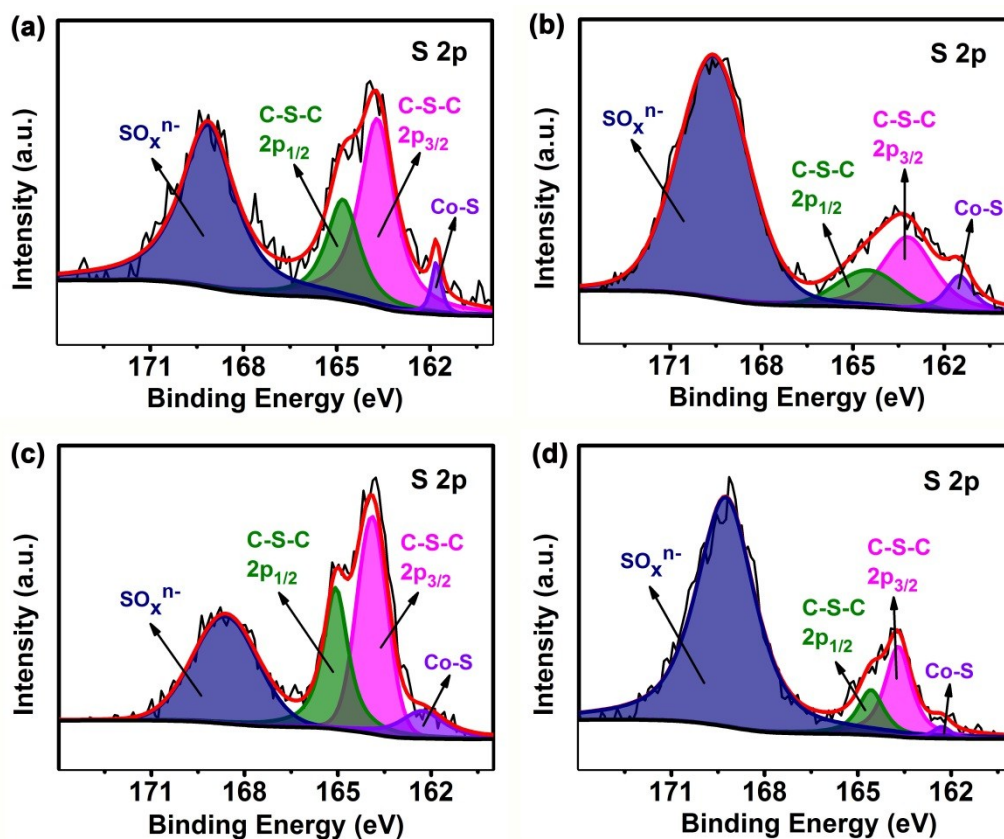

**Fig. S6** High-resolution XPS spectra of S 2p for (a) Co/Co<sub>9</sub>S<sub>8</sub>@NSOC-600; (b) Co/Co<sub>9</sub>S<sub>8</sub>@NSOC-700; (c) Co/Co<sub>9</sub>S<sub>8</sub>@NSOC-800; (d) Co/Co<sub>9</sub>S<sub>8</sub>@NSOC-900.

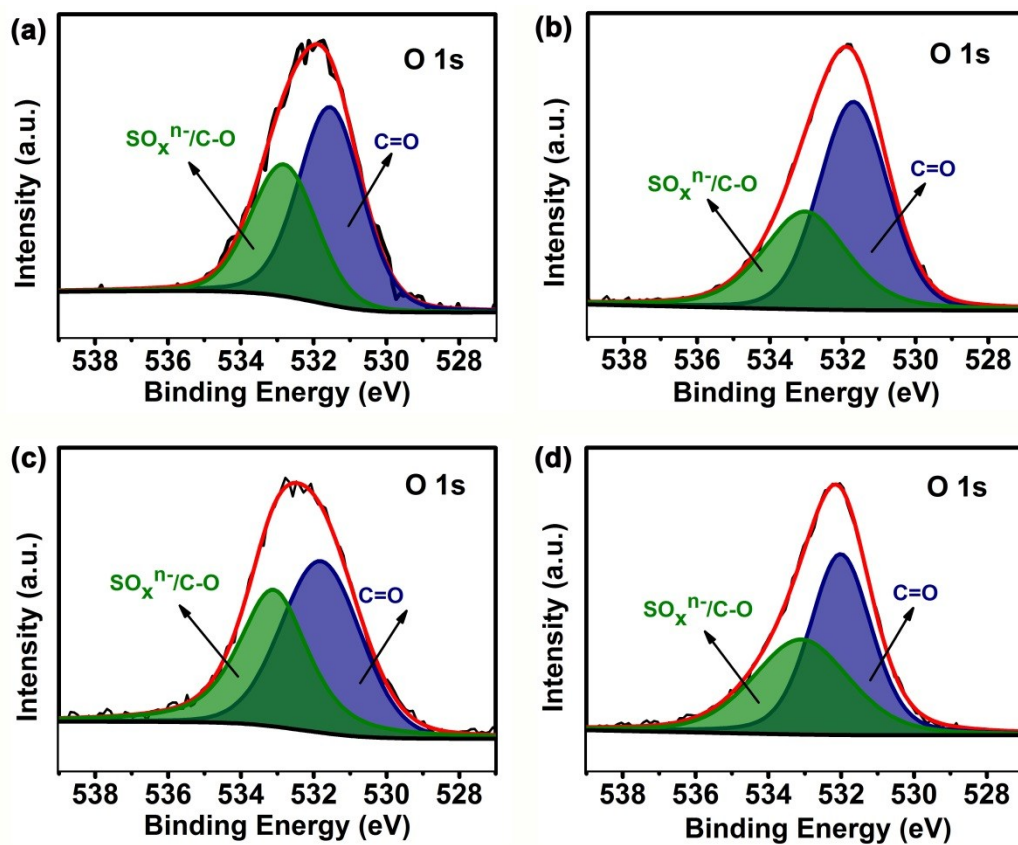

**Fig. S7** High-resolution XPS spectra of O 1s for (a) Co/Co<sub>9</sub>S<sub>8</sub>@NSOC-600; (b) Co/Co<sub>9</sub>S<sub>8</sub>@NSOC-700; (c) Co/Co<sub>9</sub>S<sub>8</sub>@NSOC-800; (d) Co/Co<sub>9</sub>S<sub>8</sub>@NSOC-900.

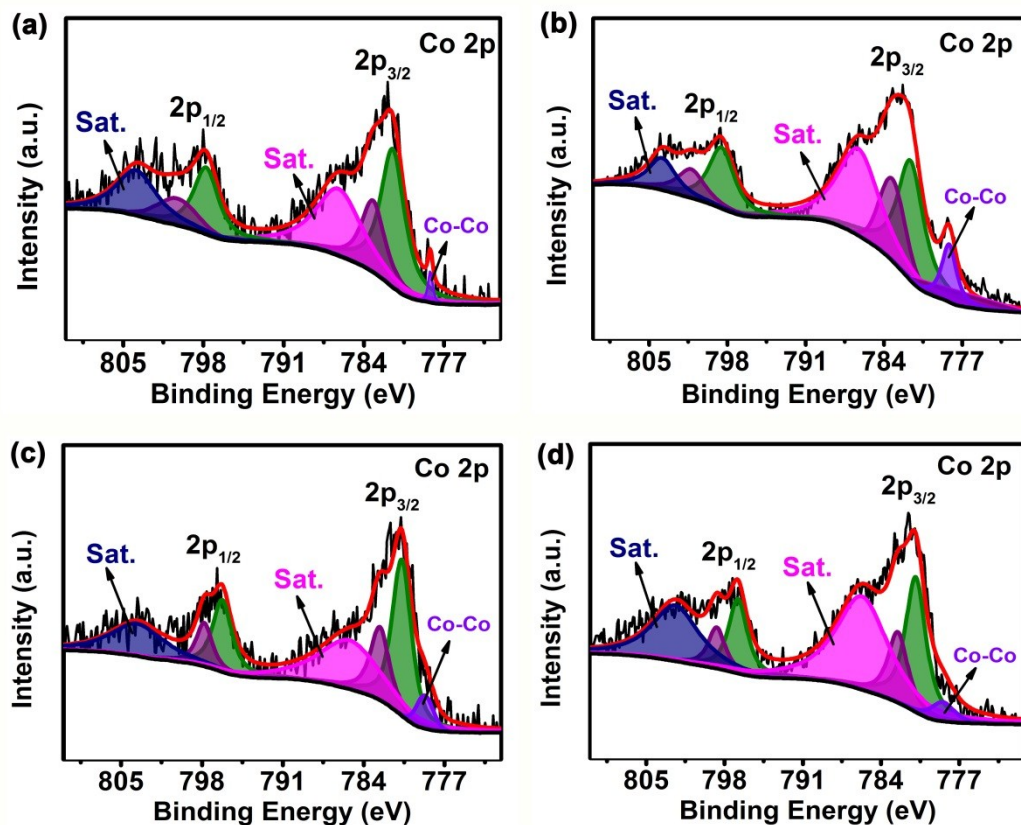

**Fig. S8** High-resolution XPS spectra of Co 2p for (a) Co/Co<sub>9</sub>S<sub>8</sub>@NSOC-600; (b) Co/Co<sub>9</sub>S<sub>8</sub>@NSOC-700; (c) Co/Co<sub>9</sub>S<sub>8</sub>@NSOC-800; (d) Co/Co<sub>9</sub>S<sub>8</sub>@NSOC-900.

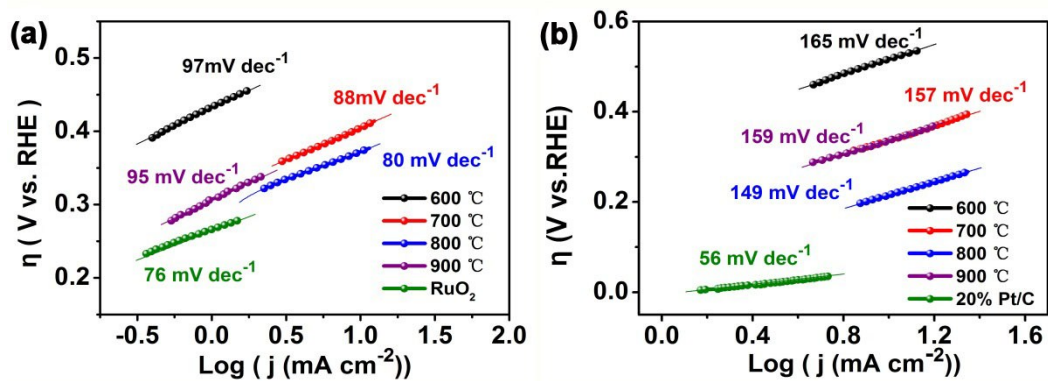

**Fig. S9** (a) Tafel plots of Co/Co<sub>9</sub>S<sub>8</sub>@NSOC-T materials and RuO<sub>2</sub> for OER; (b) Tafel plots of Co/Co<sub>9</sub>S<sub>8</sub>@NSOC-T materials and Pt/C for HER.

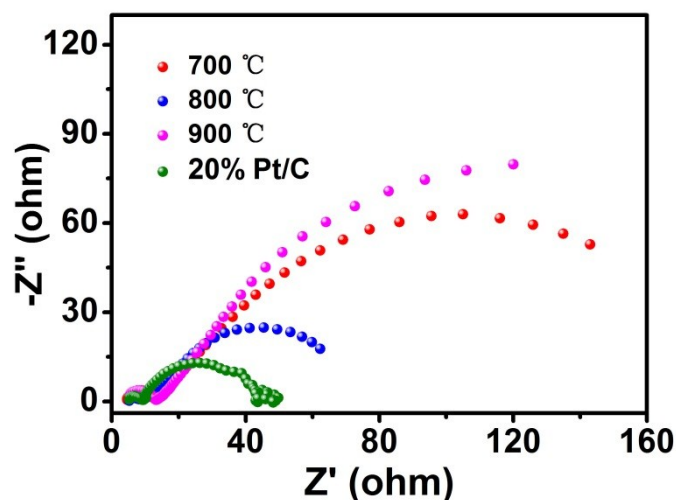

**Fig. S10** Nyquist plots of the Co/Co<sub>9</sub>S<sub>8</sub>@NSOC-T and 20% Pt/C materials recorded at the frequency from 1000000 to 0.1 Hz at -0.227 V vs. RHE.

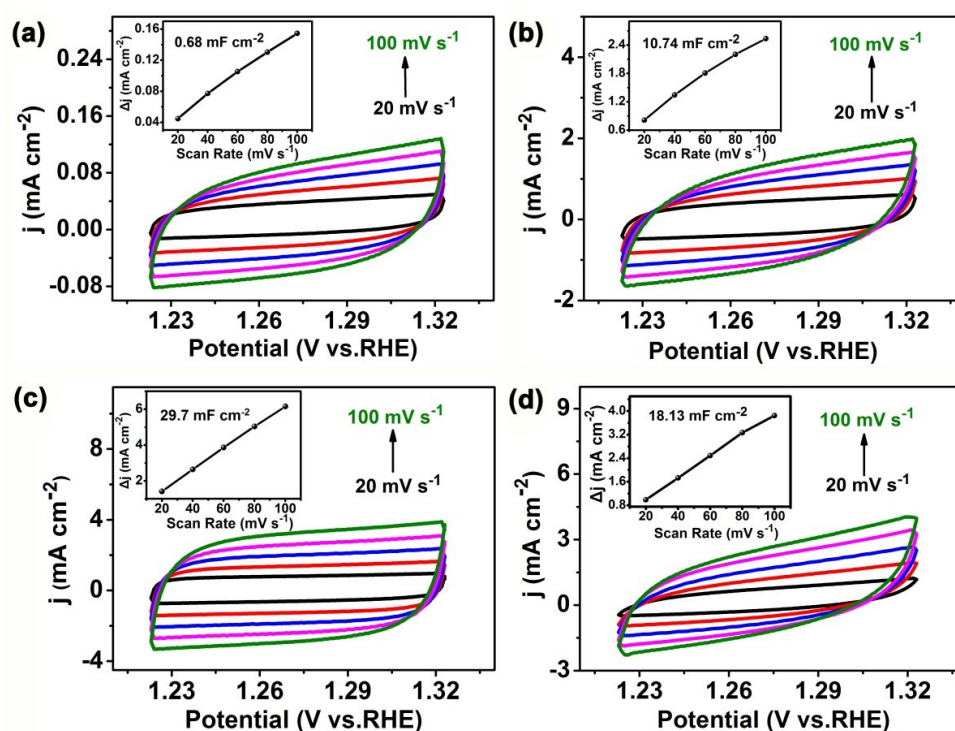

**Fig. S11** Cyclic voltammograms (CVs) measured at various scan rates from 20 to 100 mV s<sup>-1</sup> in the non-Faradaic region in 1 M KOH electrolyte. The materials are (a) Co/Co<sub>9</sub>S<sub>8</sub>@NSOC-600; (b) Co/Co<sub>9</sub>S<sub>8</sub>@NSOC-700; (c) Co/Co<sub>9</sub>S<sub>8</sub>@NSOC-800; (d) Co/Co<sub>9</sub>S<sub>8</sub>@NSOC-900; (inset: the corresponding scan rate dependence of the current density of Co/Co<sub>9</sub>S<sub>8</sub>@NSOC-600, 700, 800 and 900 respectively).

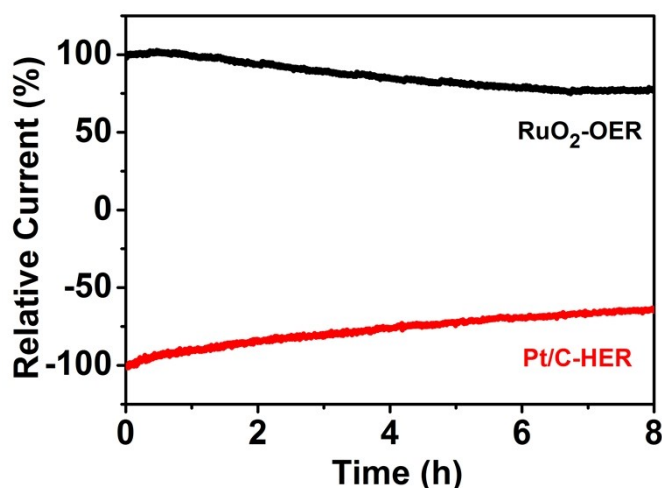

**Fig. S12** The stability test of RuO<sub>2</sub> for OER and Pt/C for HER in 1 M KOH.

Note: As shown in Fig. S12, the relative current of commercial Pt/C for HER decreased to 64% and RuO<sub>2</sub> for OER decreased to 74% after 8 h continuous operation. And as shown in Fig. 3d, the relative current of Co/Co<sub>9</sub>S<sub>8</sub>@NSOC-800 were well maintained after 10 h continuous operation for both OER and HER, indicating that the electrochemical stability of Co/Co<sub>9</sub>S<sub>8</sub>@NSOC-800 was better than that of RuO<sub>2</sub> and Pt/C.

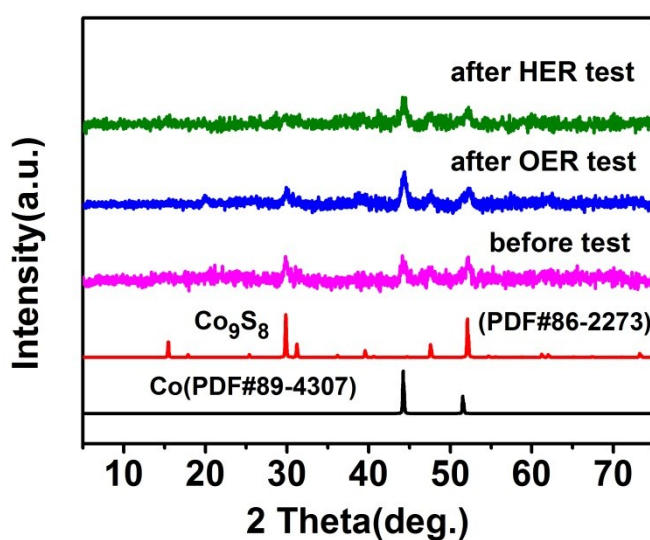

**Fig. S13** PXRD patterns of the Co/Co<sub>9</sub>S<sub>8</sub>@NSOC-800 before and after 10 h chronoamperometry test for OER and HER.

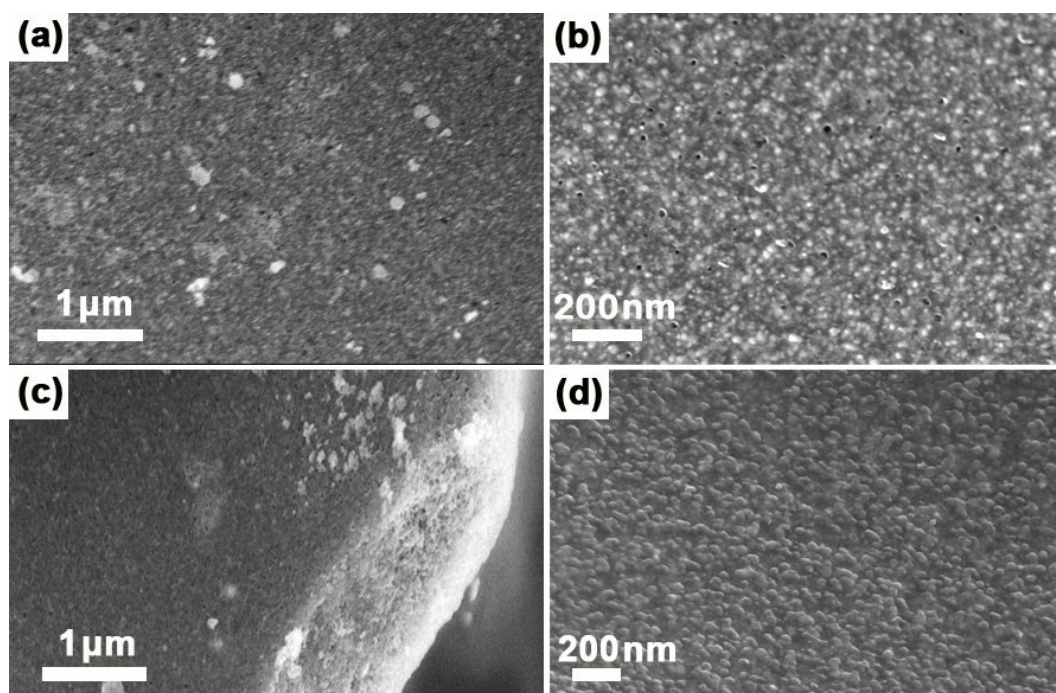

**Fig. S14** SEM images of the Co/Co<sub>9</sub>S<sub>8</sub>@NSOC-800 before and after 10 h chronoamperometric test. (a, b) after OER long-term stability test; (c, d) after HER long-term stability test.

**Table S1.** Specific surface area and total pore volume of the Co/Co<sub>9</sub>S<sub>8</sub>@NSOC materials at different temperatures.

| Sample                                      | BET surface area (m <sup>2</sup> g <sup>-1</sup> ) | Pore volume (cm <sup>3</sup> g <sup>-1</sup> ) |
|---------------------------------------------|----------------------------------------------------|------------------------------------------------|
| Co/Co <sub>9</sub> S <sub>8</sub> @NSOC-600 | 2.3                                                | 0.01                                           |
| Co/Co <sub>9</sub> S <sub>8</sub> @NSOC-700 | 38.7                                               | 0.05                                           |
| Co/Co <sub>9</sub> S <sub>8</sub> @NSOC-800 | 96.4                                               | 0.16                                           |
| Co/Co <sub>9</sub> S <sub>8</sub> @NSOC-900 | 64.2                                               | 0.13                                           |

**Table S2.** Comparison of HER and OER activity data of Co/Co<sub>9</sub>S<sub>8</sub>@NSOC-T materials.

| Catalyst | Reaction | $\eta_{j=10\text{mA cm}^{-2}}$<br>[V] | Tafel slope<br>[mV dec <sup>-1</sup> ] | C <sub>dl</sub><br>[mF cm <sup>-2</sup> ] | R <sub>ct</sub><br>[Ω] |
|----------|----------|---------------------------------------|----------------------------------------|-------------------------------------------|------------------------|
| 600 °C   | OER      | 0.530                                 | 97                                     | 0.68                                      | 648                    |
|          | HER      | 0.517                                 | 165                                    |                                           |                        |
| 700 °C   | OER      | 0.421                                 | 88                                     | 10.74                                     | 161                    |
|          | HER      | 0.336                                 | 157                                    |                                           |                        |
| 800 °C   | OER      | 0.373                                 | 80                                     | 29.70                                     | 23                     |
|          | HER      | 0.216                                 | 149                                    |                                           |                        |
| 900 °C   | OER      | 0.395                                 | 95                                     | 18.13                                     | 135                    |
|          | HER      | 0.310                                 | 159                                    |                                           |                        |

**Table S3.** Comparison of electrocatalytic OER and HER performance of Co/Co<sub>9</sub>S<sub>8</sub>@NSOC-800 with other nonnoble metal electrocatalysts in the literatures.

| Catalyst                                               | OER<br>$\eta_{j=10\text{mA cm}^{-2}}$<br>[mV] | Electrolyte | HER<br>$\eta_{j=10\text{mA cm}^{-2}}$<br>[mV] | Electrolyte                          | Ref       |
|--------------------------------------------------------|-----------------------------------------------|-------------|-----------------------------------------------|--------------------------------------|-----------|
| Co <sub>9</sub> S <sub>8</sub> @MoS <sub>2</sub> /CNFs | 430                                           | 1 M KOH     | 190                                           | 0.5 M H <sub>2</sub> SO <sub>4</sub> | S2        |
| Co <sub>3</sub> S <sub>4</sub>                         | 363                                           | 1 M KOH     | 290                                           | 1 M KOH                              | S3        |
| Co/CoO/CoFe <sub>2</sub> O <sub>4</sub>                | 330                                           | 1 M KOH     | 365                                           | 1 M KOH                              | S4        |
| CoS <sub>x</sub> @MoS <sub>2</sub>                     | 347                                           | 1 M KOH     | 239                                           | 0.5 M H <sub>2</sub> SO <sub>4</sub> | S5        |
| Co <sub>9</sub> S <sub>8</sub> @NPC-10                 | 403                                           | 1 M KOH     | 261                                           | 1 M KOH                              | 6         |
| Co-S/CP                                                | 363                                           | 1 M KOH     | 357                                           | 1 M KOH                              | S6        |
| Co <sub>x</sub> S <sub>y</sub> @C-1000                 | 470                                           | 0.1 M KOH   | —                                             | —                                    | S7        |
| PO-Ni/Ni-N-CNFs                                        | 420                                           | 1 M KOH     | 262                                           | 1 M KOH                              | S8        |
| Ni <sub>3</sub> S <sub>2</sub>                         | 400                                           | 1 M KOH     | 300                                           | 1 M KOH                              | S9        |
| Co/Co <sub>9</sub> S <sub>8</sub> @NSOC-800            | 373                                           | 1 M KOH     | 216                                           | 1 M KOH                              | This Work |

**Table S4.** Comparison of overall water splitting electrolysis cell performance of Co/Co<sub>9</sub>S<sub>8</sub>@NSOC-800 with other nonnoble metal electrocatalysts in the literatures.

| Catalyst                                                 | $E_{j=10\text{mA cm}^{-2}}$ vs. RHE | Ref       |
|----------------------------------------------------------|-------------------------------------|-----------|
| CoP                                                      | 1.62                                | S10       |
| Co <sub>3</sub> O <sub>4</sub>                           | 1.63                                | S11       |
| Ni <sub>2</sub> P                                        | 1.63                                | S12       |
| Co <sub>9</sub> S <sub>8</sub> -NSC@Mo <sub>2</sub> C/NF | 1.61                                | S13       |
| Co <sub>0.9</sub> S <sub>0.58</sub> P <sub>0.42</sub>    | 1.59                                | S14       |
| Co <sub>9</sub> S <sub>8</sub>                           | 1.60                                | 10        |
| Cu@CoFe LDH-60                                           | 1.681                               | S15       |
| Co <sub>4</sub> Ni <sub>1</sub> P                        | 1.59                                | 1         |
| O-CoMoS                                                  | 1.60                                | S16       |
| PO-Ni/Ni-N-CNFs                                          | 1.69                                | S8        |
| Co/Co <sub>9</sub> S <sub>8</sub> @NSOC-800              | 1.56                                | This Work |

## References

- [S1] G. Dong, M. Fang, H. Wang, S. Yip, H. Y. Cheung, F. Wang, C. Y. Wong, S. T. Chu, J. C. Ho, *J. Mater. Chem. A*, 2015, **3**, 13080-13086.
- [S2] H. Zhu, J. Zhang, R. Y. Zhang, M. Du, Q. Wang, G. Gao, J. Wu, G. Wu, M. Zhang, B. Liu, J. Yao, X. Zhang, *Adv. Mater.*, 2015, **27**, 4752-4759.
- [S3] Z. F. Huang, J. Song, K. Li, M. Tahir, Y. T. Wang, L. Pan, L. Wang, X. Zhang, J. J. Zou, *J. Am. Chem. Soc.*, 2016, **138**, 1359-1365.
- [S4] J. Y. Wang, C. Cui, R. B. Lin, C. H. Xu, J. Wang, Z. Q. Li, *Electrochimica Acta*, 2018, **286**, 397-405.
- [S5] L. Yang, L. Zhang, G. Xu, X. Ma, W. Wang, H. Song, D. Jia, *ACS Sustainable Chem. Eng.*, 2018, **6**, 12961-12968.
- [S6] J. Wang, H. X. Zhong, Z. L. Wang, F. L. Meng, X. B. Zhang, *ACS Nano*, 2016, **10**, 2342-2348.
- [S7] P. Zeng, J. Li, M. Ye, K. Zhuo, Z. Fang, *Chem. Eur. J.*, 2017, **23**, 9517-9524.
- [S8] Z. Y. Wu, W. B. J, B. C. Hu, H. W. Liang, X. X. Xu, Z. L. Yu, B. Y. Li, S. H. Yu, *Nano Energy*, 2018, **51**, 286-293.
- [S9] T. A. Ho, C. Bae, H. Nam, E. Kim, S. Y. Lee, J. H. Park, H. Shin, *ACS Appl. Mater. Interfaces*, 2018, **10**, 12807-12815.
- [S10] Y. P. Zhu, Y. P. Liu, T. Z. Ren, Z. Y. Yuan, *Adv. Funct. Mater.*, 2015, **25**, 7337-7347.
- [S11] P. Z. Yun, Y. M. Tian, M. Jaroniec, Z. Q. Shi, *Angew. Chem. Int. Ed.*, 2017, **56**, 1324-1328.
- [S12] L. A. Stern, L. Feng, F. Song, X. Hu, *Energy Environ. Sci.*, 2015, **8**, 2347-2351.
- [S13] H. Zhu, J. Zhang, R. Yanzhang, M. Du, Q. Wang, G. Gao, J. Wu, G. Wu, M. Zhang, B. Liu, J. Yao, X. Zhang, *Adv. Mater.*, 2015, **27**, 4752-4759.
- [S14] Z. Dai, H. Geng, J. Wang, Y. Luo, B. Li, Y. Zong, J. Yang, Y. Guo, Y. Zheng, X. Wang, Q. Yan, *ACS Nano*, 2017, **11**, 11031-11040.
- [S15] L. Yu, H. Q. Zhou, J. Y. Sun, F. Qin, D. Luo, L. X. Xie, F. Yu, J. M. Bao, Y. Li, Y. Yu, S. Chen, Z. F. Ren, *Nano Energy*, 2017, **41**, 327-336.
- [S16] J. G. Hou, B. Zhang, Z. W. Li, S. Y. Cao, Y. Q. Sun, Y. Z. Wu, Z. M. Gao, L. C. Sun, *ACS Catal.*, 2018, **8**, 4612-4621.
